# Supplementary material for: The Relationship of Lifestyle Factors with the Prevalence of Major Depressive Disorder by Ecological Factors
Source: PubMed Central journal article supplement — Psychiatry Investig. 2021 Apr 25;18(4):340–7. doi: 10.30773/pi.2020.0309 (PMC8103019; doi:10.30773/pi.2020.0309), 2021-04-25
Supplement: pi-2020-0309-suppl1.pdf [file pi-2020-0309-suppl1.pdf]

**Supplementary Table 1.** The association between the socioeconomic/lifestyle factors and major depressive disorder in male (POR)

|                                       | Age (year)       |                  | Education (year) |                   | BMI (kg/m <sup>2</sup> ) |                  | Stress*          |                  |
|---------------------------------------|------------------|------------------|------------------|-------------------|--------------------------|------------------|------------------|------------------|
|                                       | <50              | ≥50              | <12              | ≥12               | <25                      | ≥25              | Low              | High             |
| Current smoking                       | 1.17 (0.71–1.92) | 0.80 (0.53–1.21) | 0.96 (0.65–1.41) | 1.18 (0.61–2.26)  | 0.86 (0.57–1.30)         | 1.17 (0.69–1.99) | 1.06 (0.68–1.67) | 0.96 (0.60–1.55) |
| Current drinking                      | 0.54 (0.28–1.05) | 0.81 (0.54–1.20) | 0.71 (0.47–1.07) | 0.78 (0.29–2.15)  | 0.60 (0.37–0.97)         | 0.85 (0.45–1.62) | 0.84 (0.54–1.31) | 0.57 (0.29–1.14) |
| ≥15 (g/day)                           | 0.98 (0.55–1.75) | 0.90 (0.58–1.39) | 0.91 (0.60–1.38) | 1.09 (0.52–2.28)  | 0.70 (0.43–1.16)         | 1.29 (0.73–2.26) | 0.98 (0.59–1.61) | 0.93 (0.54–1.62) |
| Exercise (yes)                        | 1.02 (0.61–1.68) | 0.92 (0.60–1.42) | 0.96 (0.64–1.43) | 1.09 (0.56–2.11)  | 1.30 (0.85–1.99)         | 0.65 (0.36–1.15) | 0.97 (0.62–1.53) | 1.02 (0.62–1.68) |
| Total energy intake (IQR)             | 1.12 (0.79–1.57) | 1.02 (0.78–1.34) | 1.15 (0.89–1.49) | 0.99 (0.59–1.64)  | 1.08 (0.82–1.44)         | 1.08 (0.74–1.57) | 1.21 (0.90–1.63) | 0.97 (0.67–1.38) |
| Sleeping time (hour/day) <sup>†</sup> |                  |                  |                  |                   |                          |                  |                  |                  |
| ≤6                                    | 0.92 (0.54–1.57) | 1.28 (0.85–1.92) | 1.10 (0.75–1.62) | 1.13 (0.58–2.23)  | 1.26 (0.82–1.94)         | 0.91 (0.54–1.54) | 1.16 (0.76–1.78) | 1.02 (0.61–1.69) |
| ≥9                                    | 2.68 (1.33–5.37) | 1.57 (0.85–2.90) | 1.67 (0.96–2.90) | 4.58 (1.79–11.70) | 2.98 (1.69–5.23)         | 1.20 (0.50–2.90) | 1.54 (0.77–3.08) | 2.78 (1.38–5.62) |

\*self-recognition of stress, <sup>†</sup>ref=7–8 (hour/day). BMI: body mass index, IQR: inter quartile range, POR: prevalence odds ration after adjusted for sex, age, married status, education level, occupation, family income, residence area, BMI, self-recognition of stress, and non-communicable disease
