# Supplementary material for: The Relationship of Lifestyle Factors with the Prevalence of Major Depressive Disorder by Ecological Factors
Source: PubMed Central journal article supplement — Psychiatry Investig. 2021 Apr 25;18(4):340–7. doi: 10.30773/pi.2020.0309 (PMC8103019; doi:10.30773/pi.2020.0309), 2021-04-25
Supplement: pi-2020-0309-suppl2.pdf [file pi-2020-0309-suppl2.pdf]

**Supplementary Table 2.** The association between the socioeconomic/lifestyle factors and major depressive disorder in male (POR)

|                           | Married status   |                  | Income (\$/month) |                  | Residence area   |                  | Occupied         |                  |
|---------------------------|------------------|------------------|-------------------|------------------|------------------|------------------|------------------|------------------|
|                           | Married          | Single           | <\$3,000          | ≥\$3,000         | Urban            | Rural            | Yes              | No               |
| Current smoking           | 1.00 (0.68–1.47) | 0.99 (0.57–1.71) | 1.08 (0.73–1.60)  | 0.89 (0.50–1.58) | 1.12 (0.78–1.62) | 0.56 (0.29–1.08) | 0.96 (0.63–1.46) | 1.12 (0.66–1.90) |
| Current drinking          | 0.66 (0.42–1.03) | 0.78 (0.39–1.57) | 0.77 (0.50–1.20)  | 0.53 (0.27–1.03) | 0.90 (0.58–1.41) | 0.26 (0.13–0.56) | 0.67 (0.38–1.18) | 0.79 (0.47–1.32) |
| ≥15 (g/day)               | 0.84 (0.54–1.32) | 1.11 (0.59–2.07) | 0.90 (0.58–1.40)  | 1.02 (0.55–1.89) | 1.11 (0.75–1.66) | 0.35 (0.16–0.78) | 0.86 (0.56–1.33) | 1.16 (0.63–2.13) |
| Exercise (yes)            | 0.74 (0.49–1.12) | 1.32 (0.76–2.28) | 1.00 (0.66–1.51)  | 0.91 (0.51–1.62) | 0.91 (0.63–1.32) | 1.37 (0.61–3.06) | 0.80 (0.50–1.29) | 1.27 (0.77–2.11) |
| Total energy intake (IQR) | 1.01 (0.77–1.32) | 1.17 (0.80–1.71) | 1.03 (0.75–1.42)  | 1.13 (0.79–1.60) | 1.12 (0.86–1.46) | 0.87 (0.53–1.46) | 1.20 (0.91–1.59) | 0.97 (0.64–1.45) |
| Sleeping time (hour/day)* |                  |                  |                   |                  |                  |                  |                  |                  |
| ≤6                        | 1.40 (0.94–2.08) | 0.75 (0.42–1.34) | 1.15 (0.76–1.75)  | 1.02 (0.58–1.79) | 1.09 (0.75–1.60) | 1.10 (0.56–2.16) | 1.08 (0.69–1.68) | 1.15 (0.70–1.88) |
| ≥9                        | 2.19 (1.18–4.06) | 1.95 (0.93–4.12) | 2.34 (1.33–4.13)  | 1.68 (0.71–3.98) | 2.13 (1.26–3.59) | 2.03 (0.71–5.83) | 1.63 (0.78–3.41) | 2.34 (1.17–4.65) |

\*ref=7–8 (hour/day). IQR: inter quartile range, POR: prevalence odds ration after adjusted for sex, age, married status, education level, occupation, family income, residence area, body mass index, self-recognition of stress, and non-communicable disease
