# Supplementary material for: The Relationship of Lifestyle Factors with the Prevalence of Major Depressive Disorder by Ecological Factors
Source: PubMed Central journal article supplement — Psychiatry Investig. 2021 Apr 25;18(4):340–7. doi: 10.30773/pi.2020.0309 (PMC8103019; doi:10.30773/pi.2020.0309), 2021-04-25
Supplement: pi-2020-0309-suppl3.pdf [file pi-2020-0309-suppl3.pdf]

**Supplementary Table 3.** The association between the socioeconomic/lifestyle factors and major depressive disorder in female (POR)

|                                       | Age (year)       |                  | Education (year) |                  | BMI (kg/m <sup>2</sup> ) |                  | Stress*          |                  |
|---------------------------------------|------------------|------------------|------------------|------------------|--------------------------|------------------|------------------|------------------|
|                                       | <50              | ≥50              | <12              | ≥12              | <25                      | ≥25              | Low              | High             |
| Current smoking                       | 2.35 (1.70–3.25) | 1.01 (0.67–1.53) | 1.64 (1.24–2.17) | 3.19 (1.72–5.90) | 1.59 (1.16–2.20)         | 2.55 (1.70–3.81) | 1.54 (1.00–2.36) | 1.99 (1.41–2.82) |
| Current drinking                      | 1.04 (0.80–1.36) | 1.14 (0.95–1.38) | 1.10 (0.92–1.30) | 1.17 (0.80–1.73) | 1.06 (0.88–1.29)         | 1.27 (0.98–1.64) | 0.97 (0.79–1.18) | 1.31 (1.04–1.65) |
| ≥15 (g/day)                           | 1.89 (1.34–2.67) | 1.22 (0.69–2.17) | 1.63 (1.17–2.27) | 2.18 (1.13–4.21) | 1.67 (1.14–2.45)         | 1.95 (1.16–3.26) | 1.01 (0.61–1.68) | 2.27 (1.52–3.38) |
| Exercise (yes)                        | 0.98 (0.71–1.36) | 1.04 (0.79–1.36) | 1.02 (0.81–1.28) | 0.93 (0.58–1.51) | 0.89 (0.69–1.16)         | 1.32 (0.94–1.84) | 0.97 (0.74–1.28) | 1.06 (0.77–1.45) |
| Total energy intake (IQR)             | 0.99 (0.80–1.23) | 1.06 (0.91–1.24) | 1.06 (0.93–1.22) | 0.93 (0.66–1.32) | 1.00 (0.84–1.18)         | 1.13 (0.92–1.39) | 0.98 (0.83–1.17) | 1.08 (0.89–1.31) |
| Sleeping time (hour/day) <sup>†</sup> |                  |                  |                  |                  |                          |                  |                  |                  |
| ≤6                                    | 1.37 (1.06–1.78) | 1.18 (0.98–1.42) | 1.28 (1.08–1.52) | 1.21 (0.81–1.82) | 1.38 (1.14–1.66)         | 1.05 (0.80–1.36) | 1.17 (0.96–1.43) | 1.39 (1.09–1.77) |
| ≥9                                    | 1.38 (0.94–2.04) | 1.03 (0.74–1.43) | 1.21 (0.90–1.63) | 1.30 (0.75–2.28) | 1.26 (0.91–1.73)         | 1.16 (0.76–1.79) | 0.96 (0.67–1.39) | 1.58 (1.07–2.34) |

\*self-recognition of stress, <sup>†</sup>ref=7–8 (hour/day). BMI: body mass index, IQR: inter quartile range, POR: prevalence odds ration after adjusted for sex, age, married status, education level, occupation, family income, residence area, BMI, self-recognition of stress, and non-communicable disease
