# Supplementary material for: The Relationship of Lifestyle Factors with the Prevalence of Major Depressive Disorder by Ecological Factors
Source: PubMed Central journal article supplement — Psychiatry Investig. 2021 Apr 25;18(4):340–7. doi: 10.30773/pi.2020.0309 (PMC8103019; doi:10.30773/pi.2020.0309), 2021-04-25
Supplement: pi-2020-0309-suppl4.pdf [file pi-2020-0309-suppl4.pdf]

**Supplementary Table 4.** The association between the socioeconomic/lifestyle factors and major depressive disorder in female (POR)

|                           | Married status   |                  | Income (\$/month) |                  | Residence area   |                  | Occupied         |                  |
|---------------------------|------------------|------------------|-------------------|------------------|------------------|------------------|------------------|------------------|
|                           | Married          | Single           | <\$3,000          | ≥\$3,000         | Urban            | Rural            | Yes              | No               |
| Current smoking           | 1.53 (1.05–2.22) | 2.14 (1.48–3.10) | 1.69 (1.24–2.29)  | 2.23 (1.39–3.56) | 1.99 (1.50–2.64) | 1.10 (0.59–2.06) | 2.03 (1.35–3.04) | 1.74 (1.26–2.40) |
| Current drinking          | 1.06 (0.88–1.29) | 1.20 (0.92–1.56) | 1.16 (0.96–1.40)  | 1.04 (0.80–1.36) | 1.13 (0.94–1.35) | 1.10 (0.79–1.53) | 0.89 (0.70–1.13) | 1.28 (1.06–1.55) |
| ≥15 (g/day)               | 1.61 (1.09–2.39) | 1.95 (1.22–3.11) | 1.29 (0.86–1.93)  | 2.58 (1.65–4.04) | 1.87 (1.37–2.56) | 1.04 (0.50–2.19) | 1.94 (1.27–2.97) | 1.54 (1.01–2.36) |
| Exercise (yes)            | 1.00 (0.79–1.26) | 1.03 (0.67–1.56) | 0.95 (0.72–1.25)  | 1.07 (0.79–1.45) | 1.00 (0.80–1.26) | 1.21 (0.72–2.05) | 1.00 (0.73–1.38) | 1.02 (0.78–1.33) |
| Total energy intake (IQR) | 1.04 (0.89–1.22) | 1.03 (0.81–1.32) | 1.18 (1.02–1.37)  | 0.84 (0.67–1.05) | 1.05 (0.91–1.21) | 0.92 (0.70–1.21) | 0.99 (0.80–1.22) | 1.06 (0.89–1.25) |
| Sleeping time (hour/day)* |                  |                  |                   |                  |                  |                  |                  |                  |
| ≤6                        | 1.22 (1.01–1.46) | 1.40 (1.05–1.88) | 1.35 (1.10–1.65)  | 1.16 (0.91–1.49) | 1.28 (1.07–1.52) | 1.22 (0.90–1.64) | 1.41 (1.11–1.80) | 1.17 (0.96–1.43) |
| ≥9                        | 1.20 (0.88–1.64) | 1.28 (0.81–2.02) | 1.36 (0.99–1.87)  | 1.01 (0.64–1.60) | 1.23 (0.91–1.66) | 1.13 (0.70–1.83) | 1.27 (0.82–1.98) | 1.19 (0.86–1.64) |

\*ref=7–8 (hour/day). IQR: inter quartile range, POR: prevalence odds ration after adjusted for sex, age, married status, education level, occupation, family income, residence area, body mass index, self-recognition of stress, and non-communicable disease
